# Supplementary material for: Temporal Trends in Phthalate Exposures: Findings from the National Health and Nutrition Examination Survey, 2001–2010
Source: PubMed Central journal article supplement (PMC3948032; doi:10.1289/ehp.1306681), 2014-01-15
Supplement: ehp.1306681.s001.pdf [file ehp.1306681.s001.pdf]

**Supplemental Material**  
**Temporal Trends in Phthalate Exposures: Findings from  
the National Health and Nutrition Examination Survey,  
2001–2010**

Ami R. Zota, Antonia M. Calafat, and Tracey J. Woodruff

**Table of Contents**

|                                      |        |
|--------------------------------------|--------|
| Supplemental Material, Table S1..... | Page 2 |
| Supplemental Material, Table S2..... | Page 3 |
| Supplemental Material, Table S3..... | Page 4 |
| Supplemental Material, Table S4..... | Page 6 |
| Supplemental Material, Table S5..... | Page 8 |
| Supplemental Material, Table S6..... | Page 9 |

Supplemental Material, Table S1. Limits of detection (LOD) for urinary phthalate metabolites by NHANES cycle.

| Parent compound: <i>Phthalate metabolite</i>                       | 2001-02<br>(ng/mL) | 2003-04<br>(ng/mL) | 2005-06<br>(ng/mL) | 2007-08<br>(ng/mL) | 2009-10<br>(ng/mL) | Maximum<br>LOD<br>(ng/mL) |
|--------------------------------------------------------------------|--------------------|--------------------|--------------------|--------------------|--------------------|---------------------------|
| <b>Dimethyl phthalate (DMP)</b>                                    |                    |                    |                    |                    |                    |                           |
| <i>Monomethyl phthalate (MMP)</i>                                  | 0.2                | 1.0                | 1.1                | 1.1                | 0.5                | 1.1                       |
| <b>Diethyl phthalate (DEP)</b>                                     |                    |                    |                    |                    |                    |                           |
| <i>Monoethyl phthalate (MEP)<sup>a</sup></i>                       | 0.6                | 0.3                | 0.5                | 0.5                | 0.5                | 0.6                       |
| <b>Di-n-butyl phthalate (DnBP)</b>                                 |                    |                    |                    |                    |                    |                           |
| <i>Mono-n-butyl phthalate (MnBP)<sup>a</sup></i>                   | 1.1                | 0.4                | 0.6                | 0.6                | 0.4                | 1.1                       |
| <b>Di-iso-butyl phthalate (DiBP)</b>                               |                    |                    |                    |                    |                    |                           |
| <i>Monoisobutyl phthalate (MiBP)<sup>a</sup></i>                   | 1.0                | 0.3                | 0.3                | 0.3                | 0.2                | 1.0                       |
| <b>Butylbenzyl phthalate (BBzP)</b>                                |                    |                    |                    |                    |                    |                           |
| <i>Monobenzyl phthalate (MBzP)<sup>a</sup></i>                     | 0.2                | 0.1                | 0.2                | 0.2                | 0.2                | 0.2                       |
| <b>Dicyclohexyl phthalate (DCHP)</b>                               |                    |                    |                    |                    |                    |                           |
| <i>Monocyclohexyl phthalate (MCHP)</i>                             | 0.6                | 0.4                | 0.6                | 0.6                | 0.4                | 0.6                       |
| <b>Di (2-ethylhexyl) phthalate (DEHP)</b>                          |                    |                    |                    |                    |                    |                           |
| <i>Mono(2-ethylhexyl) phthalate (MEHP)<sup>a</sup></i>             | 1.0                | 0.9                | 1.2                | 1.1                | 0.5                | 1.2                       |
| <i>Mono(2-ethyl-5-hydroxyhexyl) phthalate (MEHHP)<sup>a</sup></i>  | 1.0                | 0.3                | 0.7                | 0.7                | 0.2                | 1.0                       |
| <i>Mono(2-ethyl-5-oxohexyl) phthalate (MEOHP)<sup>a</sup></i>      | 1.1                | 0.5                | 0.7                | 0.6                | 0.2                | 1.1                       |
| <i>Mono(2-ethyl-5-carboxypentyl) phthalate (MECPP)<sup>a</sup></i> | --                 | 0.3                | 0.6                | 0.5                | 0.2                | 0.6                       |
| <b>Di-n-octyl phthalate (DnOP)</b>                                 |                    |                    |                    |                    |                    |                           |
| <i>Mono(3-carboxypropyl) phthalate (MCPP)<sup>a</sup></i>          | 0.4                | 0.2                | 0.2                | 0.2                | 0.2                | 0.4                       |
| <i>Monooctyl phthalate (MOP)</i>                                   | 1.7                | 1.7                | 1.9                | 1.9                | 0.8                | 1.9                       |
| <b>Di-iso-nonyl phthalate (DiNP)</b>                               |                    |                    |                    |                    |                    |                           |
| <i>Monoisononyl phthalate (MiNP)</i>                               | 1.2                | 1.5                | 1.2                | 1.2                | 0.8                | 1.5                       |
| <i>Monocarboxyoctyl phthalate (MCOP)<sup>a</sup></i>               | --                 | --                 | 0.7                | 0.7                | 0.2                | 0.7                       |
| <b>Di-iso-decyl phthalates (DiDP)</b>                              |                    |                    |                    |                    |                    |                           |
| <i>Monocarboxynonyl phthalate (MCNP)<sup>a</sup></i>               | --                 | --                 | 0.6                | 0.5                | 0.2                | 0.6                       |

<sup>a</sup>Indicates phthalate metabolites included in the present study.

**Supplemental Material, Table S2.** Detection frequency (%) of phthalate metabolites by NHANES sampling cycle using maximal LODs (N = 11071).

| <b>Parent compound: Phthalate metabolite</b>                      | <b>2001-02<br/>(n = 2418)</b> | <b>2003-04<br/>(n = 2278)</b> | <b>2005-06<br/>(n = 2243)</b> | <b>2007-08<br/>(n = 2040)</b> | <b>2009-10<br/>(n = 2092)</b> | <b>P-value<sup>a</sup></b> |
|-------------------------------------------------------------------|-------------------------------|-------------------------------|-------------------------------|-------------------------------|-------------------------------|----------------------------|
| <b>Dimethyl phthalate (DMP)</b>                                   |                               |                               |                               |                               |                               |                            |
| <i>Monomethyl phthalate (MMP)</i>                                 | 60                            | 54                            | 37                            | 38                            | 45                            | < 0.0001                   |
| <b>Diethyl phthalate (DEP)</b>                                    |                               |                               |                               |                               |                               |                            |
| <i>Monoethyl phthalate (MEP)<sup>b</sup></i>                      | 100                           | 100                           | 100                           | 100                           | 100                           | 0.17                       |
| <b>Di-n-butyl phthalate (DnBP)</b>                                |                               |                               |                               |                               |                               |                            |
| <i>Mono-n-butyl phthalate (MnBP)<sup>b</sup></i>                  | 98                            | 98                            | 99                            | 98                            | 98                            | 0.73                       |
| <b>Di-iso-butyl phthalate (DiBP)</b>                              |                               |                               |                               |                               |                               |                            |
| <i>Monoisobutyl phthalate (MiBP)<sup>b</sup></i>                  | 72                            | 88                            | 89                            | 94                            | 96                            | < 0.0001                   |
| <b>Butylbenzyl phthalate (BBzP)</b>                               |                               |                               |                               |                               |                               |                            |
| <i>Monobenzyl phthalate (MBzP)<sup>b</sup></i>                    | 99                            | 99                            | 98                            | 98                            | 99                            | 0.06                       |
| <b>Dicyclohexyl phthalate (DCHP)</b>                              |                               |                               |                               |                               |                               |                            |
| <i>Monocyclohexyl phthalate (MCHP)</i>                            | 15                            | 6                             | 2                             | 4                             | 2                             | < 0.0001                   |
| <b>Di (2-ethylhexyl) phthalate (DEHP)</b>                         |                               |                               |                               |                               |                               |                            |
| <i>Mono(2-ethylhexyl) phthalate (MEHP)<sup>b</sup></i>            | 78                            | 61                            | 67                            | 66                            | 56                            | < 0.0001                   |
| <i>Mono(2-ethyl-5-hydroxyhexyl) phthalate (MEHHP)<sup>b</sup></i> | 98                            | 98                            | 99                            | 99                            | 98                            | 0.04                       |
| <i>Mono(2-ethyl-5-oxohexyl) phthalate (MEOHP)<sup>b</sup></i>     | 96                            | 97                            | 98                            | 96                            | 96                            | 0.01                       |
| <i>Mono(2-ethyl-5-carboxypentyl) phthalate (MECPP)</i>            | --                            | 100                           | 100                           | 100                           | 100                           | 0.36                       |
| <b>Di-n-octyl phthalate (DnOP)</b>                                |                               |                               |                               |                               |                               |                            |
| <i>Mono(3-carboxypropyl) phthalate (MCP)<sup>b</sup></i>          | 93                            | 96                            | 93                            | 95                            | 95                            | 0.0008                     |
| <i>Monooctyl phthalate (MOP)</i>                                  | 2                             | 1                             | 1                             | 1                             | 1                             | 0.05                       |
| <b>Di-iso-nonyl phthalate (DiNP)</b>                              |                               |                               |                               |                               |                               |                            |
| <i>Monoisononyl phthalate (MiNP)</i>                              | 4                             | 5                             | 11                            | 10                            | 28                            | < 0.0001                   |
| <i>Monocarboxyoctyl phthalate (MCOP)<sup>b</sup></i>              | --                            | --                            | 96                            | 96                            | 98                            | 0.007                      |
| <b>Di-iso-decyl phthalates (DiDP)</b>                             |                               |                               |                               |                               |                               |                            |
| <i>Monocarboxynonyl phthalate (MCNP)<sup>b</sup></i>              | --                            | --                            | 89                            | 90                            | 94                            | 0.004                      |

<sup>a</sup>P-value for overall comparison of groups evaluated by chi-square test of independence. <sup>b</sup>Indicates phthalate metabolites included in the present study.

**Supplemental Material, Table S3.** Association between phthalate metabolites concentrations (ng/ml) and NHANES cycle in the US general population after adjustment for urinary creatinine concentrations, calculated from multivariable regression models (N = 11071).<sup>a</sup>

| Metabolite                     |                   | 2001-2002<br>(n = 2418) | 2003-2004<br>(n = 2278) | 2005-2006<br>(n = 2243) | 2007-2008<br>(n = 2040) | 2009-2010<br>(n = 2092) | P-value <sup>b</sup> |
|--------------------------------|-------------------|-------------------------|-------------------------|-------------------------|-------------------------|-------------------------|----------------------|
| MEP                            | % change (95% CI) | (ref)                   | 6 (-9, 23)              | -5 (-17, 9)             | -20 (-30, -9)           | -42 (-49, -34)          | < 0.0001             |
|                                | LSGM (95% CI)     | 115.4 (106.0, 125.7)    | 122.2 (108.4, 137.8)    | 109.4 (98.1, 122)       | 91.9 (83.3, 101.4)      | 66.8 (61.0, 73.0)       |                      |
| MnBP                           | % change (95% CI) | (ref)                   | 7 (-1, 16)              | 5 (-3, 13)              | 5 (-3, 14)              | -17 (-23, -9)           | < 0.0001             |
|                                | LSGM (95% CI)     | 18.4 (17.4, 19.5)       | 19.7 (18.5, 20.9)       | 19.2 (18.2, 20.3)       | 19.4 (18.3, 20.6)       | 15.3 (14.4, 16.3)       |                      |
| MiBP                           | % change (95% CI) | (ref)                   | 43 (27, 62)             | 106 (87, 127)           | 188 (163, 216)          | 206 (178, 236)          | < 0.0001             |
|                                | LSGM (95% CI)     | 2.6 (2.4, 2.7)          | 3.7 (3.3, 4.1)          | 5.3 (4.9, 5.7)          | 7.4 (6.9, 7.9)          | 7.8 (7.3, 8.4)          |                      |
| MBzP                           | % change (95% CI) | (ref)                   | -9 (-17, -1)            | -20 (-29, -9)           | -27 (-34, -20)          | -32 (-39, -23)          | < 0.0001             |
|                                | LSGM (95% CI)     | 10.4 (9.7, 11.1)        | 9.4 (8.9, 10.0)         | 8.3 (7.5, 9.2)          | 7.6 (7.1, 8.1)          | 7.1 (6.5, 7.8)          |                      |
| MEHP                           | % change (95% CI) | (ref)                   | -42 (-49, -34)          | -29 (-37, -20)          | -36 (-45, -25)          | -53 (-59, -45)          | < 0.0001             |
|                                | LSGM (95% CI)     | 4.1 (3.7, 4.6)          | 2.4 (2.2, 2.6)          | 3.0 (2.8, 3.2)          | 2.6 (2.4, 3.0)          | 2.0 (1.7, 2.2)          |                      |
| MEHHP                          | % change (95% CI) | (ref)                   | 5 (-7, 18)              | 31 (15, 50)             | 16 (-1, 35)             | -29 (-40, -15)          | < 0.0001             |
|                                | LSGM (95% CI)     | 19.5 (17.8, 21.3)       | 20.4 (18.8, 22.1)       | 25.6 (23.2, 28.2)       | 22.5 (19.9, 25.6)       | 13.8 (11.9, 16.1)       |                      |
| MEOHP                          | % change (95% CI) | (ref)                   | 4 (-8, 17)              | 25 (10, 42)             | -4 (-17, 12)            | -34 (-43, -22)          | < 0.0001             |
|                                | LSGM (95% CI)     | 13.1 (12.0, 14.2)       | 13.6 (12.5, 14.9)       | 16.4 (14.9, 18.0)       | 12.6 (11.1, 14.2)       | 8.7 (7.6, 10.0)         |                      |
| MECPP <sup>c</sup>             | % change (95% CI) | --                      | (ref)                   | -14 (-1, 31)            | -2 (-17, 17)            | -40 (-48, -30)          | < 0.0001             |
|                                | LSGM (95% CI)     | --                      | 33.9 (30.6, 37.5)       | 38.6 (34.9, 42.6)       | 33.2 (28.9, 38.2)       | 20.4 (18.1, 23.0)       |                      |
| ∑DEHP metabolites <sup>d</sup> | % change (95% CI) | (ref)                   | -6 (-16, 6)             | 16 (2, 30)              | -3 (-16, 13)            | -37 (-46, -26)          | < 0.0001             |
|                                | LSGM (95% CI)     | 39.3 (36.3, 42.5)       | 37.0 (34.1, 40.2)       | 45.4 (41.4, 49.7)       | 38.3 (33.9, 43.3)       | 24.8 (21.5, 28.5)       |                      |
| MCCP                           | % change (95% CI) | (ref)                   | 9 (-2, 21)              | -20 (-29, -10)          | 11 (0, 24)              | 25 (8, 45)              | < 0.0001             |
|                                | LSGM (95% CI)     | 2.7 (2.4, 2.9)          | 2.9 (2.7, 3.1)          | 2.1 (2.0, 2.3)          | 3.0 (2.8, 3.1)          | 3.3 (3.0, 3.7)          |                      |
| MCOP <sup>c</sup>              | % change (95% CI) | --                      | --                      | (ref)                   | 31 (8, 58)              | 149 (102, 207)          | < 0.0001             |
|                                | LSGM (95% CI)     | --                      | --                      | 5.3 (4.6, 6.1)          | 7.0 (6.1, 8.0)          | 13.3 (11.4, 15.5)       |                      |
| MCNP <sup>c</sup>              | % change (95% CI) | --                      | --                      | (ref)                   | -7 (-18, 5)             | 15 (1, 30)              | 0.004                |
|                                | LSGM (95% CI)     | --                      | --                      | 2.7 (2.4, 2.9)          | 2.5 (2.3, 2.7)          | 3.1 (2.8, 3.3)          |                      |

<sup>a</sup>The percent changes and least square geometric means (LSGMs) were calculated from multivariate regression models where the dependent variables were natural log-transformed phthalate metabolite concentrations and the independent variables were NHANES cycle (using four indicator terms and 2001-2002 participants as the reference group) and natural log-transformed urinary creatinine concentrations. We estimated the percent change in phthalate metabolite concentrations by NHANES cycle as  $(e^{(b)} - 1) * 100\%$  with 95% confidence intervals (CIs) estimated

as  $(e^{(\beta \pm 1.99 * SE)} - 1)$  where  $\beta$  and SE are the estimated regression coefficient and standard error, respectively. We estimated least squares geometric means (LSGMs) of phthalate metabolites concentrations by NHANES cycle as  $e^{(\text{least squares means})}$  with 95% CIs as  $e^{(\text{least squares mean} \pm 1.99 * SE)}$  where the least squares means are the cycle-specific means of phthalate metabolite concentrations after adjustment for covariates. We used a critical value of  $\pm 1.99$  from the t distribution for the calculation of all confidence intervals. <sup>b</sup>P-value for the overall comparison between groups assessed by the Wald Test. <sup>c</sup>Not measured in NHANES 2001-2002. <sup>d</sup> $\sum$ DEHP metabolites (expressed as ng/mL) is the molar sum of MEHP (MW = 278), MEHHP (MW = 294), and MEOHP (MW = 292) multiplied by the average MW of the three metabolites (MW = 288). <sup>e</sup>Not measured in NHANES 2001-2002 or 2003-2004.

**Supplemental Material, Table S4.** Association (LSGM (95% CI) between phthalate metabolites and NHANES sampling cycle in the US general population by age in the US general population (N = 11071)<sup>a</sup>.

|                                |                   | <b>2001-2002<br/>(n = 2418)</b> | <b>2003-2004<br/>(n = 2278)</b> | <b>2005-2006<br/>(n = 2243)</b> | <b>2007-2008<br/>(n = 2040)</b> | <b>2009-2010<br/>(n = 2092)</b> | <b>P<sub>interaction</sub><sup>b</sup></b> |
|--------------------------------|-------------------|---------------------------------|---------------------------------|---------------------------------|---------------------------------|---------------------------------|--------------------------------------------|
| MEP                            |                   |                                 |                                 |                                 |                                 |                                 | 0.04                                       |
| Children                       | % change (95% CI) | <i>(ref)</i>                    | 2 (-14, 21)                     | -4 (-24, 20)                    | -7 (-21, 9)                     | -32 (-42, -20)                  |                                            |
|                                | LSGM (95% CI)     | 62.8 (55.7, 70.1)               | 63.4 (56.3, 72.2)               | 59.7 (49.4, 72.2)               | 58.6 (52.5, 64.7)               | 42.5 (42.1, 62.2)               |                                            |
| Adolescents                    | % change (95% CI) | <i>(ref)</i>                    | 8 (-14, 38)                     | -6 (-25, 19)                    | -27 (-43, -6)                   | -51 (-62, -36)                  |                                            |
|                                | LSGM (95% CI)     | 103.5 (86.5, 124.0)             | 113.3 (96.5, 131.6)             | 97.5 (84.8, 113.3)              | 75.2 (62.8, 90.9)               | 50.9 (42.1, 62.2)               |                                            |
| Adults                         | % change (95% CI) | <i>(ref)</i>                    | 5 (-10, 22)                     | -6 (-17, 6)                     | -22 (-30, -13)                  | -43 (-49, -36)                  |                                            |
|                                | LSGM (95% CI)     | 127.7 (117.9, 137.0)            | 134.3 (117.9, 151.4)            | 119.1 (108.9, 131.6)            | 99.5 (91.8, 107.8)              | 72.2 (66.0, 79.0)               |                                            |
| ∑DEHP metabolites <sup>c</sup> |                   |                                 |                                 |                                 |                                 |                                 | 0.002                                      |
| Children                       | % change (95% CI) | <i>(ref)</i>                    | 0 (-21, 26)                     | -7 (-19, 8)                     | -13 (-29, 6)                    | -51 (-59, -42)                  |                                            |
|                                | LSGM (95% CI)     | 73.0 (66.7, 79.8)               | 73.0 (59.1, 90.9)               | 68.7 (61.6, 76.7)               | 63.4 (53.0, 75.9)               | 35.5 (30.9, 41.3)               |                                            |
| Adolescents                    | % change (95% CI) | <i>(ref)</i>                    | -1 (-16, 16)                    | 19 (-4, 48)                     | 2 (-23, 35)                     | -39 (-55, -20)                  |                                            |
|                                | LSGM (95% CI)     | 39.3 (34.8, 43.8)               | 38.5 (34.1, 43.4)               | 46.5 (38.5, 56.3)               | 40.0 (31.2, 51.4)               | 23.6 (18.2, 30.9)               |                                            |
| Adults                         | % change (95% CI) | <i>(ref)</i>                    | -7 (-17, 6)                     | 19 (4, 36)                      | -1 (-15, 16)                    | -34 (-45, -21)                  |                                            |
|                                | LSGM (95% CI)     | 36.2 (32.8, 40.0)               | 33.8 (31.5, 36.6)               | 42.9 (39.3, 47.0)               | 36.2 (32.1, 40.4)               | 24.0 (20.9, 27.7)               |                                            |
| MCPP                           |                   |                                 |                                 |                                 |                                 |                                 | 0.0004                                     |
| Children                       | % change (95% CI) | <i>(ref)</i>                    | 5 (-9, 21)                      | -25 (-36, -11)                  | 11 (-10, 38)                    | -14 (-27, 2)                    |                                            |
|                                | LSGM (95% CI)     | 7.3 (6.8, 7.9)                  | 7.7 (6.9, 8.6)                  | 5.5 (4.7, 6.4)                  | 8.2 (6.6, 10.0)                 | 6.3 (5.4, 7.3)                  |                                            |
| Adolescents                    | % change (95% CI) | <i>(ref)</i>                    | -2 (-14, 11)                    | -22 (-33, -9)                   | 4 (-12, 22)                     | 12 (-9, 35)                     |                                            |
|                                | LSGM (95% CI)     | 3.0 (2.7, 3.4)                  | 3.0 (2.7, 3.2)                  | 2.4 (2.1, 2.7)                  | 3.2 (2.8, 3.6)                  | 3.4 (2.9, 4.0)                  |                                            |
| Adults                         | % change (95% CI) | <i>(ref)</i>                    | 12 (0, 26)                      | -18 (-27, -8)                   | 15 (3, 28)                      | 36 (19, 57)                     |                                            |
|                                | LSGM (95% CI)     | 2.3 (2.1, 2.5)                  | 2.6 (2.4, 2.7)                  | 1.9 (1.7, 2.0)                  | 2.6 (2.5, 2.8)                  | 3.1 (2.8, 3.5)                  |                                            |
| MCNP <sup>d</sup>              |                   |                                 |                                 |                                 |                                 |                                 | 0.009                                      |
| Children                       | % change (95% CI) | --                              | --                              | <i>(ref)</i>                    | -19 (-33, -2)                   | -8 (-23, 9)                     |                                            |
|                                | LSGM (95% CI)     | --                              | --                              | 5.0 (4.3, 5.6)                  | 4.0 (3.5, 4.6)                  | 4.5 (4.0, 5.2)                  |                                            |
| Adolescents                    | % change (95% CI) | --                              | --                              | <i>(ref)</i>                    | -7 (-21, 9)                     | 2 (-16, 25)                     |                                            |
|                                | LSGM (95% CI)     | --                              | --                              | 2.6 (2.2, 3.0)                  | 2.4 (2.2, 2.6)                  | 2.6 (2.3, 3.0)                  |                                            |
| Adults                         | % change (95% CI) | --                              | --                              | <i>(ref)</i>                    | -4 (-16, 9)                     | 21 (6, 38)                      |                                            |
|                                | LSGM (95% CI)     | --                              | --                              | 2.5 (2.3, 2.7)                  | 2.4 (2.2, 2.6)                  | 3.0 (2.8, 3.3)                  |                                            |

<sup>a</sup>Estimates are from linear regression models of interactions between NHANES sampling cycles and age adjusted for urinary creatinine, sex, race/ethnicity, and PIR. The least square geometric means (LSGMs) were calculated from multivariate regression models where the dependent variables were natural log-

transformed phthalate metabolite concentrations and the independent variables were NHANES cycle (using four indicator terms and 2001-2002 participants as the reference group) and natural log-transformed urinary creatinine concentrations. We estimated the percent change in phthalate metabolite concentrations by NHANES cycle as  $(e^{\beta} - 1) * 100\%$  with 95% confidence intervals (CIs) estimated as  $(e^{\beta \pm 1.99 * SE} - 1)$  where  $\beta$  and SE are the estimated regression coefficient and standard error, respectively. We estimated least squares geometric means (LSGMs) of phthalate metabolites concentrations by NHANES cycle as  $e^{(\text{least squares means})}$  with 95% CIs as  $e^{(\text{least squares mean} \pm 1.99 * SE)}$  where the least squares means are the cycle-specific means of phthalate metabolite concentrations after adjustment for covariates. We used a critical value of  $\pm 1.99$  from the t distribution for the calculation of all confidence intervals. <sup>b</sup>P-value for the overall comparison between groups assessed by the Wald Test. <sup>c</sup> $\Sigma$ DEHP metabolites (expressed as ng/mL) is the molar sum of MEHP (MW = 278), MEHHP (MW = 294), and MEOHP (MW = 292) multiplied by the average MW of the three metabolites (MW = 288). <sup>d</sup>Not measured in NHANES 2001-2002 or 2003-2004.

**Supplemental Material, Table S5.** Association (LSGM (95% CI) between phthalate metabolites and NHANES sampling cycle in the US general population by sex in the US general population (N = 11071).<sup>a</sup>

|                                |                   | <b>2001-2002<br/>(n = 2418)</b> | <b>2003-2004<br/>(n = 2278)</b> | <b>2005-2006<br/>(n = 2243)</b> | <b>2007-2008<br/>(n = 2040)</b> | <b>2009-2010<br/>(n = 2092)</b> | <b>P<sub>interaction</sub><sup>b</sup></b> |
|--------------------------------|-------------------|---------------------------------|---------------------------------|---------------------------------|---------------------------------|---------------------------------|--------------------------------------------|
| MnBP                           |                   |                                 |                                 |                                 |                                 |                                 | 0.03                                       |
| Males                          | % change (95% CI) | <i>(ref)</i>                    | 4 (-6, 15)                      | 9 (1, 20)                       | 7 (-3, 19)                      | -10 (-17, 0)                    |                                            |
|                                | LSGM (95% CI)     | 14.6 (13.6, 15.6)               | 15.2 (14.2, 16.1)               | 16.0 (15.3, 16.8)               | 15.6 (14.6, 16.8)               | 13.2 (12.4, 14.2)               |                                            |
| Females                        | % change (95% CI) | <i>(ref)</i>                    | 11 (-2, 23)                     | 3 (-9, 16)                      | 6 (-7, 20)                      | -21 (-30, -12)                  |                                            |
|                                | LSGM (95% CI)     | 22.6 (20.9, 24.5)               | 25.0 (22.9, 27.1)               | 23.3 (21.3, 25.5)               | 24.0 (21.8, 26.3)               | 17.8 (16.4, 19.3)               |                                            |
| ∑DEHP metabolites <sup>c</sup> |                   |                                 |                                 |                                 |                                 |                                 | 0.0001                                     |
| Males                          | % change (95% CI) | <i>(ref)</i>                    | 8 (-18, 4)                      | 20 (4, 36)                      | -6 (21, 12)                     | -31 (-41, -19)                  |                                            |
|                                | LSGM (95% CI)     | 36.2 (32.8, 39.6)               | 33.1 (30.9, 35.9)               | 42.9 (38.9, 47.5)               | 33.8 (29.7, 38.9)               | 25.0 (22.0, 28.5)               |                                            |
| Females                        | % change (95% CI) | <i>(ref)</i>                    | -2 (-15, 14)                    | 14 (0, 31)                      | 4 (-10, 21)                     | -41 (-51, -27)                  |                                            |
|                                | LSGM (95% CI)     | 41.7 (38.1, 46.1)               | 41.3 (36.6, 46.1)               | 47.9 (43.4, 52.5)               | 43.4 (38.5, 48.9)               | 25.0 (21.1, 29.4)               |                                            |

<sup>a</sup>Estimates are from linear regression models of interactions between NHANES sampling cycles and sex adjusted for urinary creatinine, age (continuous), race/ethnicity, and PIR. The least square geometric means (LSGMs) were calculated from multivariate regression models where the dependent variables were natural log-transformed phthalate metabolite concentrations and the independent variables were NHANES cycle (using four indicator terms and 2001-2002 participants as the reference group) and natural log-transformed urinary creatinine concentrations. We estimated the percent change in phthalate metabolite concentrations by NHANES cycle as  $(e^{\beta} - 1) * 100\%$  with 95% confidence intervals (CIs) estimated as  $(e^{\beta \pm 1.99 * SE} - 1)$  where  $\beta$  and SE are the estimated regression coefficient and standard error, respectively. We estimated least squares geometric means (LSGMs) of phthalate metabolites concentrations by NHANES cycle as  $e^{(\text{least squares means})}$  with 95% CIs as  $e^{(\text{least squares mean} \pm 1.99 * SE)}$  where the least squares means are the cycle-specific means of phthalate metabolite concentrations after adjustment for covariates. We used a critical value of  $\pm 1.99$  from the t distribution for the calculation of all confidence intervals. <sup>b</sup>P-value for the overall comparison between groups assessed by the Wald Test. <sup>c</sup>∑DEHP metabolites (expressed as ng/mL) is the molar sum of MEHP (MW = 278), MEHHP (MW = 294), and MEOHP (MW = 292) multiplied by the average MW of the three metabolites (MW = 288).



**Supplemental Material, Table S6. US chemical production data (pounds per year) by reporting year as provided by the US EPA.<sup>a</sup>**

| Species | Cas No.    | 1990        | 1994        | 1998        | 2002        | 2006        | 2012         |
|---------|------------|-------------|-------------|-------------|-------------|-------------|--------------|
| BBzP    | 85-68-7    | 100 – 500 M | 50 – 100 M  | 100 – 500 M | 50 – 100 M  | 50 – 100 M  | 50 – 100 M   |
| DEHP    | 117-81-7   | 100 – 500 M | 100 – 500 M | 100 – 500 M | 100 – 500 M | 100 – 500 M | 153 M        |
| DnBP    | 84-74-2    | 10 – 50 M   | 10 – 50 M   | 10 – 50 M   | 10 – 50 M   | 10 – 50 M   | 7 M          |
| DiBP    | 84-69-5    | 1 – 10 M    | 1 – 10 M    | 1 – 10 M    | 0.5 – 1 M   | 0.5 – 1 M   | 0.5 M        |
| DEP     | 84-66-2    | 10 – 50 M   | 10 – 50 M   | 10 – 50 M   | 10 – 50 M   | 10 – 50 M   | 6 M          |
| DNOP    | 117-84-0   | 1 – 10 M    | 1 – 10 M    | 1 – 10 M    | 1 – 10 M    | 10 – 50 M   | Confidential |
| DINP 1  | 68515-48-0 | > 1B        | 100 – 500 M | 100 – 500 M | 100 – 500 M | 100 – 500 M | 100 – 250 M  |
| DINP 2  | 28553-12-0 | 10 – 50 M   | 10 – 50 M   | 10 – 50 M   | 10 – 50 M   | 100 – 500 M | N/A          |
| DIDP 1  | 26761-40-0 | 50 – 100 M  | 50 – 100 M  | 10 – 50 M   | 1 – 10 M    | 1 – 10 M    | 50 – 100 M   |
| DIDP 2  | 68515-49-1 | 100 – 500 M | 100 – 500 M | 100 – 500 M | 100 – 500 M | 100 – 500 M | 163 M        |

<sup>a</sup>Data obtained through the non-confidential US EPA Chemical Data Reporting Program. M = million, B = billion.

More information at <http://epa.gov/cdr/>
